# Supplementary material for: Quantitative analysis of heparan sulfate using isotopically labeled calibrants
Source: PubMed Central journal article supplement (PMC7403576; doi:10.1038/s42003-020-01150-6), 2020-08-04
Supplement: 42003_2020_1150_MOESM1_ESM.pdf [file 42003_2020_1150_MOESM1_ESM.pdf]

# **Quantitative analysis of heparan sulfate using isotopically labeled calibrants**

(Supporting information)

## Supplementary Figures

### Supplementary Fig. S1

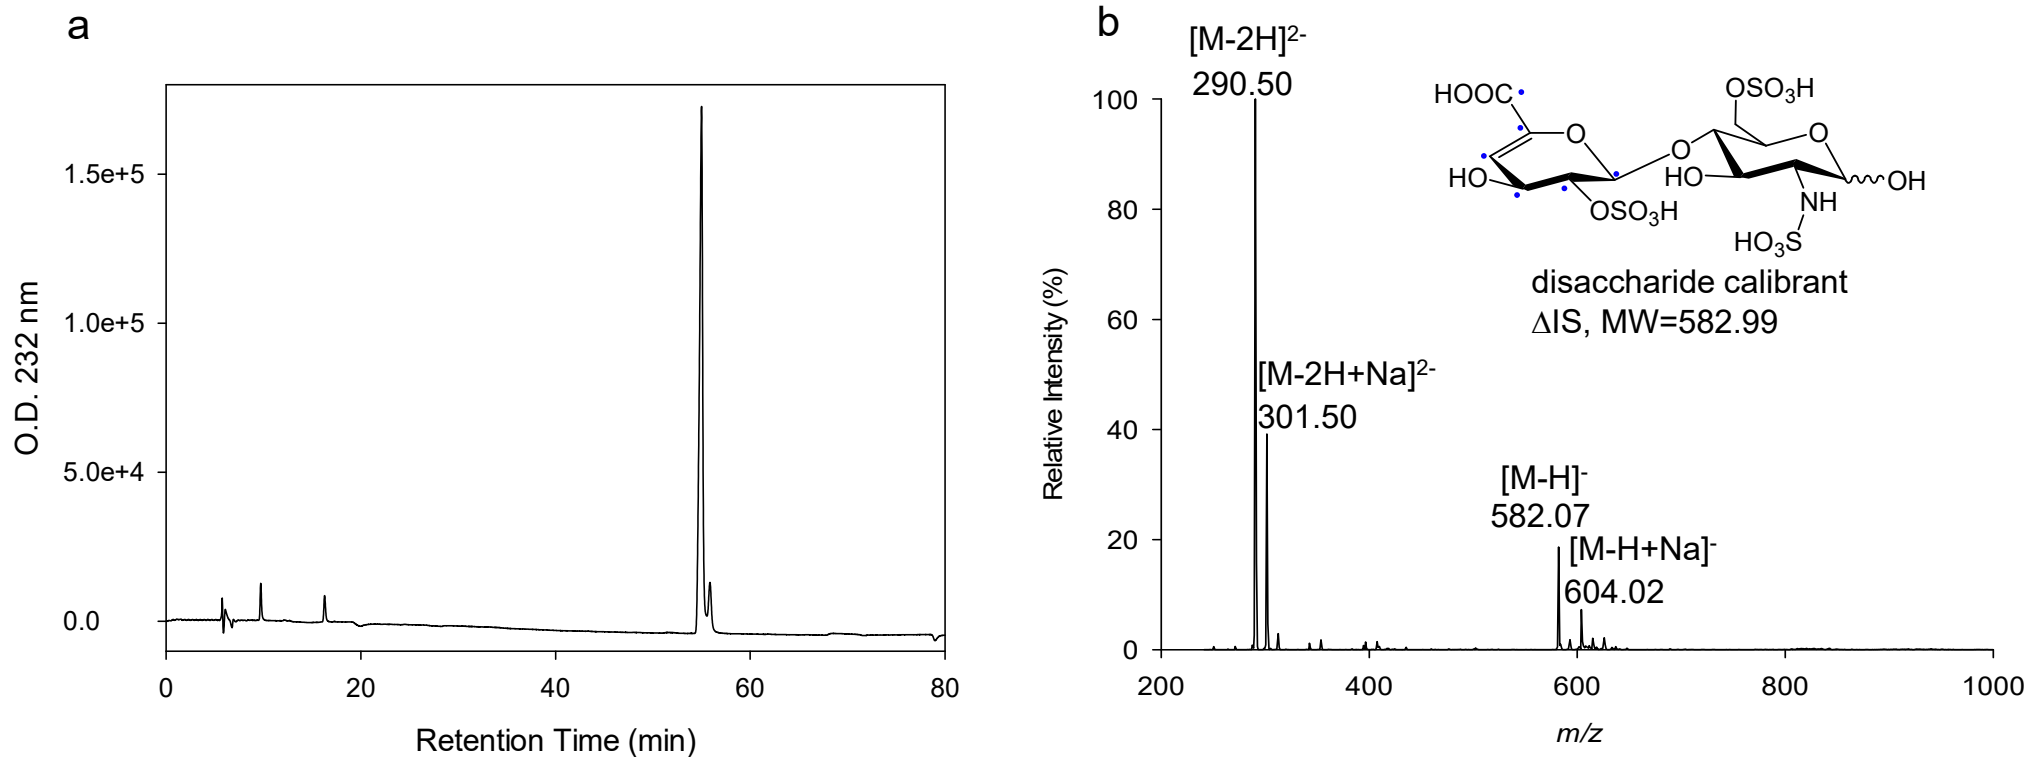

**Supplementary Fig. 1.** Purity analysis of disaccharide calibrant  $\Delta$ IS. Panel **a** shows the SAX-HPLC chromatogram. A major single peak with a small shoulder peak was eluted at 56 min, suggesting that the chemical purity of disaccharide calibrant  $\Delta$ IS is high. The small shoulder peak is an anomeric isomer. Panel **b** shows the ESI-MS spectrum of disaccharide calibrant  $\Delta$ IS. The measured MW was 583.04, which is very close to the calculated value of 582.99. No signal in the  $m/z$  value of 287.48  $[M-2H]^{2-}$  and 575.97  $[M-H]^-$ , the molecular ions representing unlabeled  $\Delta$ IS counterpart. The data suggest that our preparation of disaccharide calibrant  $\Delta$ IS standard has high isotopic purity.

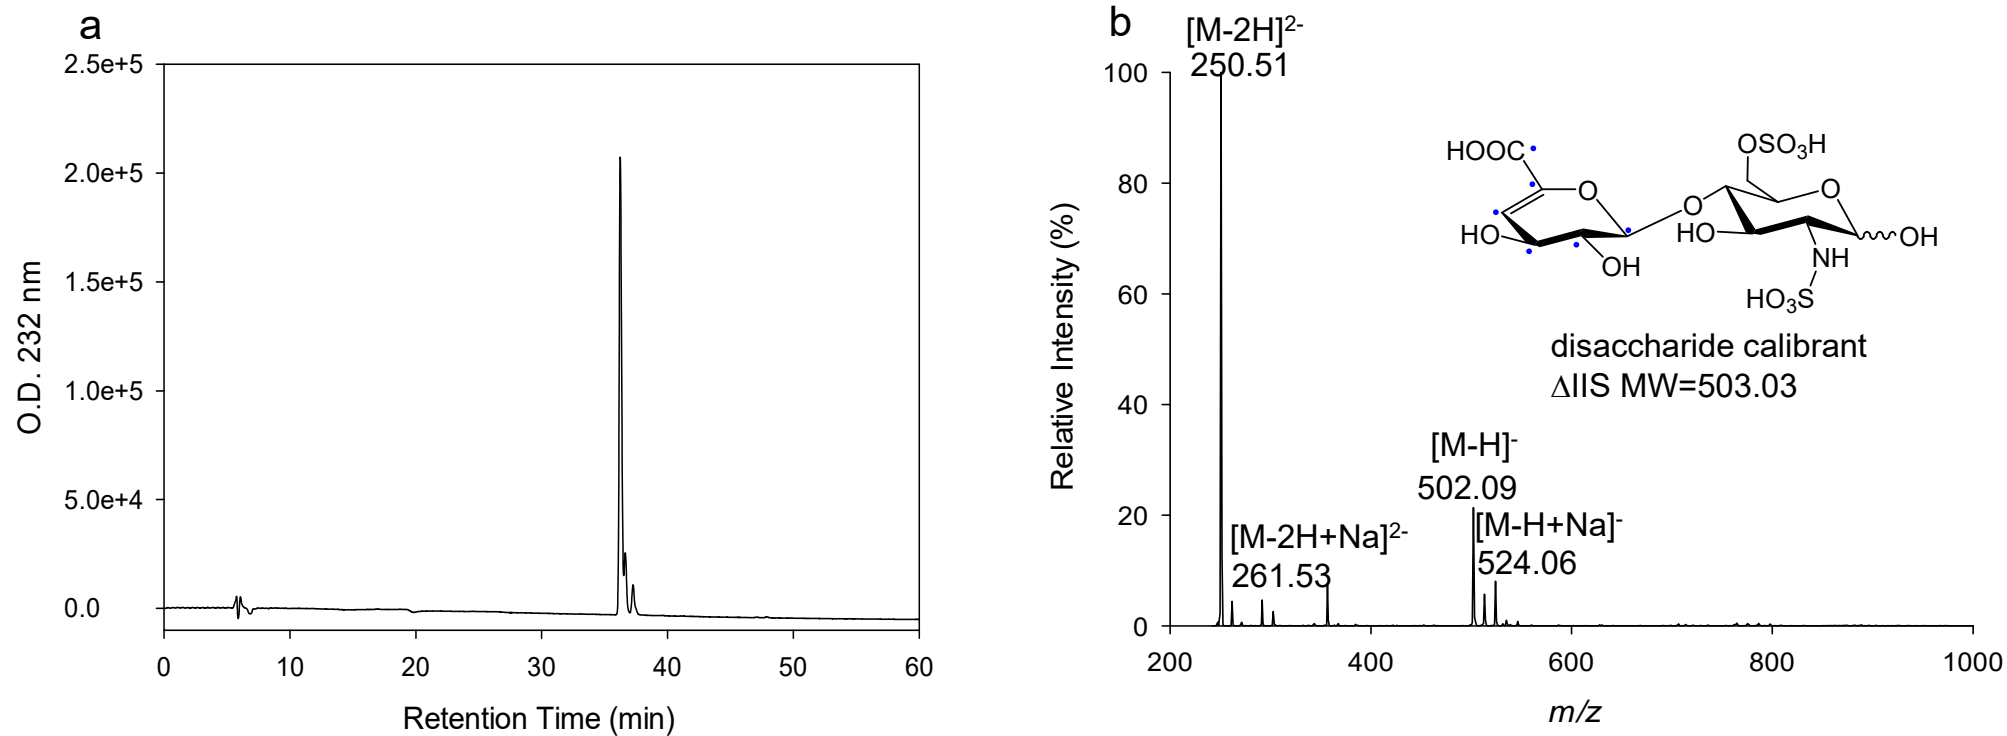

**Supplementary Fig. 2.** Purity analysis of disaccharide calibrant  $\Delta$ IIS. Panel **a** shows the SAX-HPLC chromatogram. A major single peak with a small shoulder peak was eluted at 36 min, suggesting that the chemical purity of disaccharide calibrant  $\Delta$ IIS is high. The small shoulder peak is an anomeric isomer. Panel **b** shows the ESI-MS spectrum of disaccharide calibrant  $\Delta$ IIS. The measured MW was 503.04, which is very close to the calculated value of 503.03. No signal in the  $m/z$  value of 247.51  $[M-2H]^{2-}$  and 496.01  $[M-H]^-$ , the molecular ions representing unlabeled  $\Delta$ IIS counterpart. The data suggest that our preparation of disaccharide calibrant  $\Delta$ IIS standard has high isotopic purity.

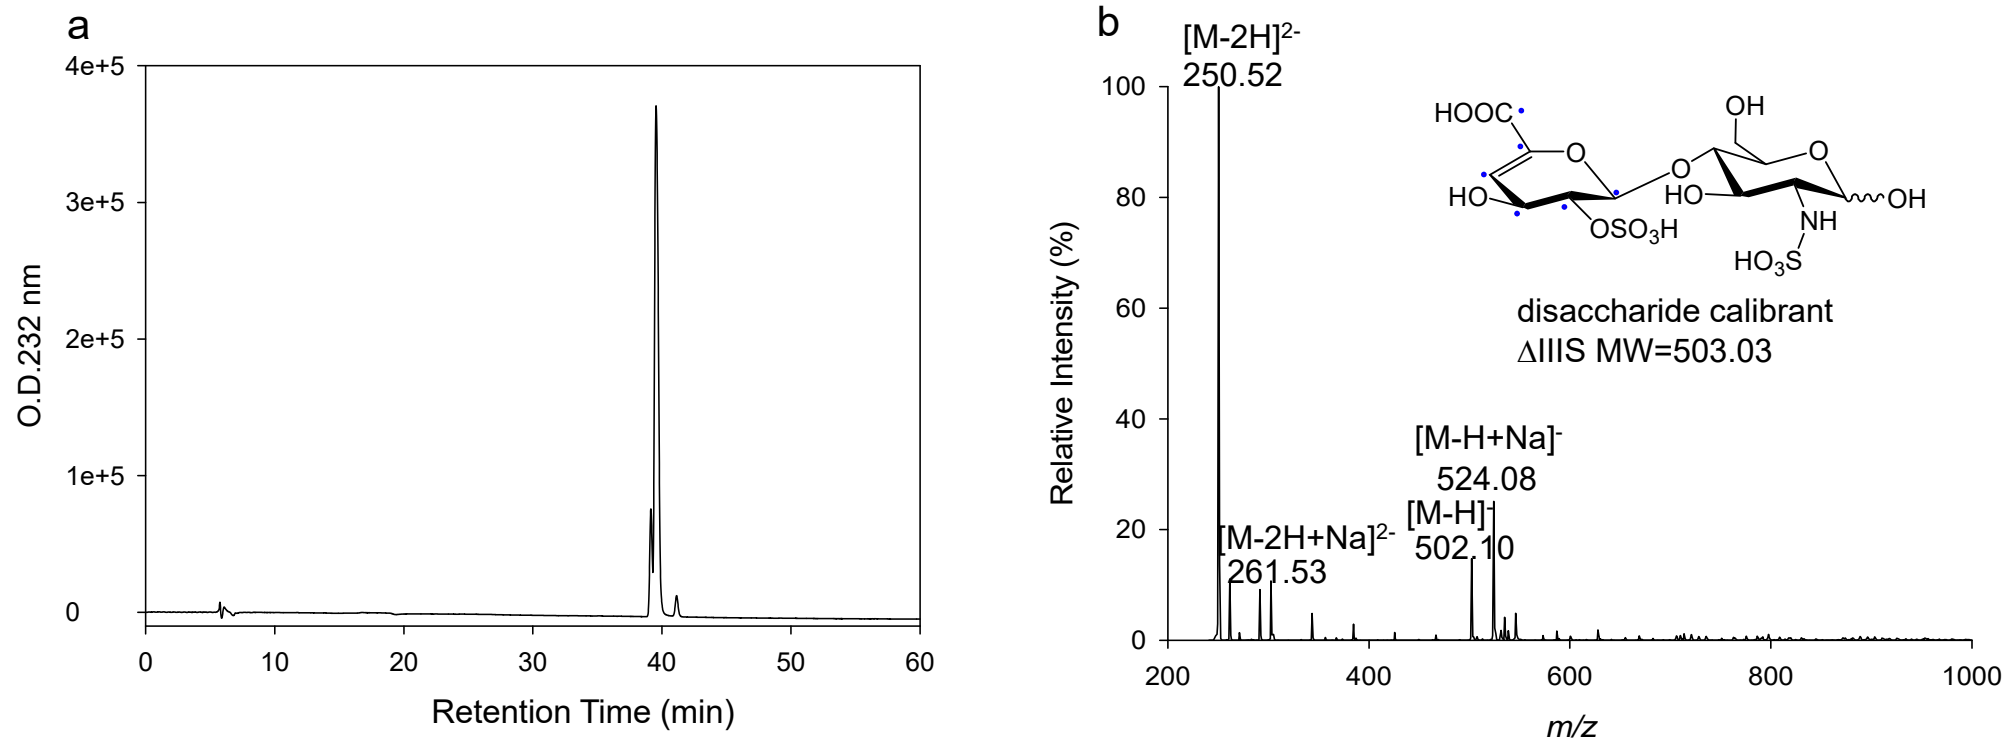

**Supplementary Fig. 3.** Purity analysis of disaccharide calibrant  $\Delta$ IIS. Panel **a** shows the SAX-HPLC chromatogram. A major single peak with a small shoulder peak was eluted at 39 min, suggesting that the chemical purity of disaccharide calibrant  $\Delta$ IIS is high. The small shoulder peak is an anomeric isomer. Panel **b** shows the ESI-MS spectrum of disaccharide calibrant  $\Delta$ IIS. The measured MW was 503.06, which is very close to the calculated value of 503.03. No signal in the  $m/z$  value of 247.51  $[M-2H]^{2-}$  and 496.01  $[M-H]^{-}$ , the molecular ions representing unlabeled  $\Delta$ IIS counterpart. The data suggest that our preparation of disaccharide calibrant  $\Delta$ IIS standard has high isotopic purity.

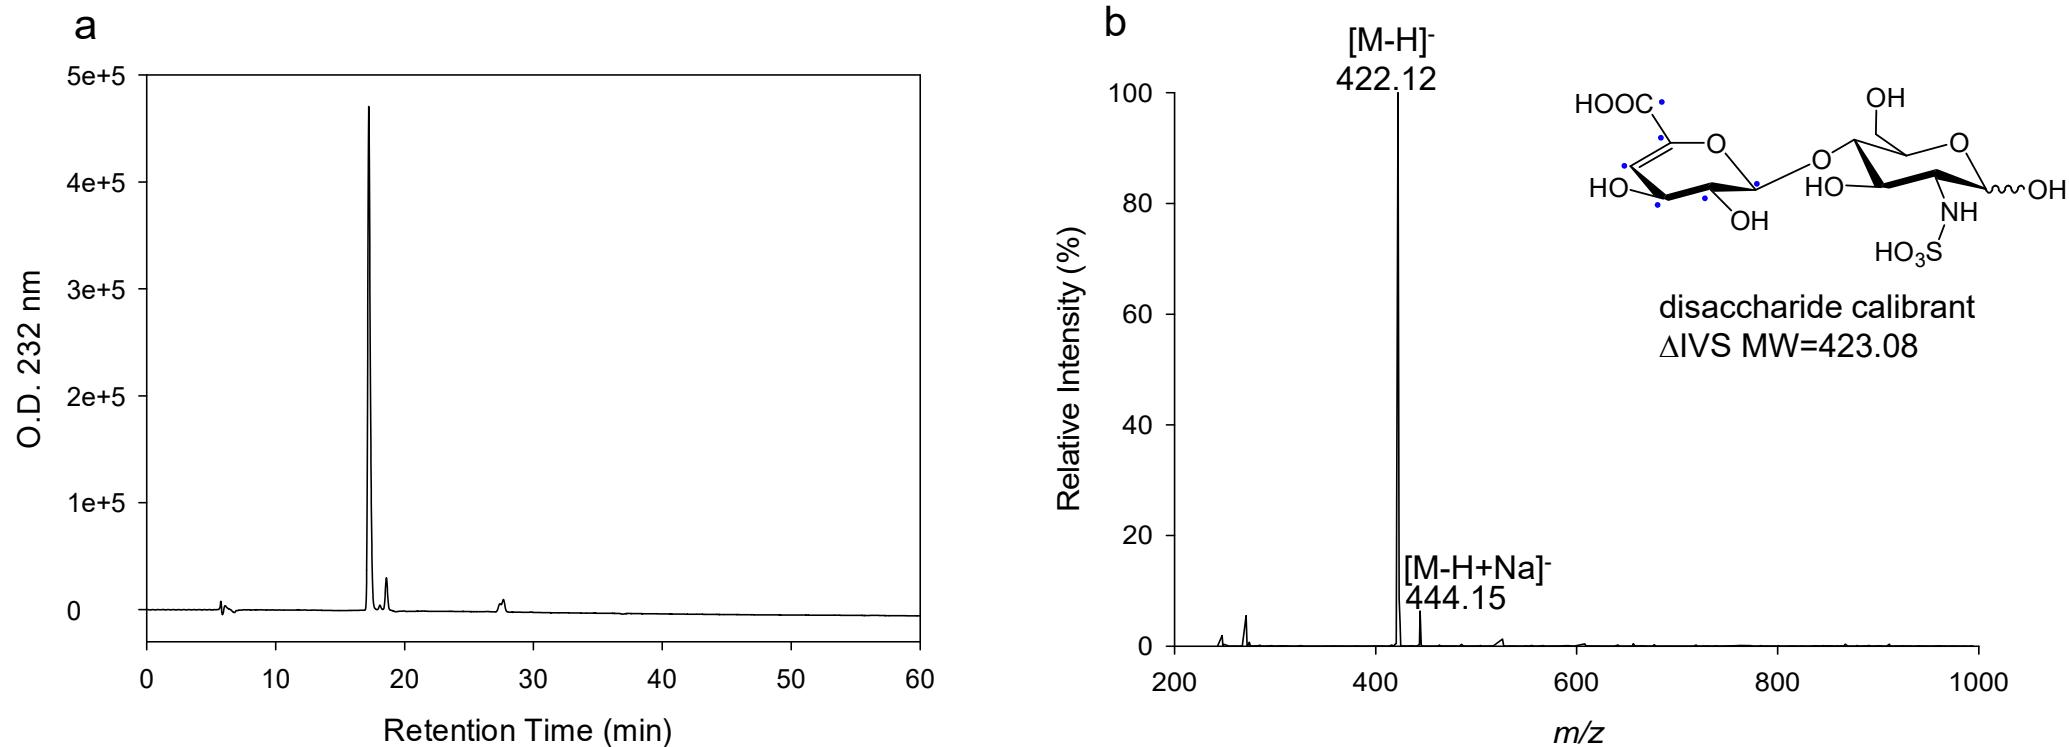

**Supplementary Fig. 4.** Purity analysis of disaccharide calibrant  $\Delta$ IVS. Panel **a** shows the SAX-HPLC chromatogram. A major single peak was eluted at 17 min, suggesting that the chemical purity of disaccharide calibrant  $\Delta$ IVS is high. Panel **b** shows the ESI-MS spectrum of disaccharide calibrant  $\Delta$ IVS. The measured MW was 423.12, which is very close to the calculated value of 423.08. No signal in the  $m/z$  value of 416.06  $[M-H]^-$ , the molecular ions representing unlabeled  $\Delta$ IVS counterpart. The data suggest that our preparation of disaccharide calibrant  $\Delta$ IVS standard has high isotopic purity.

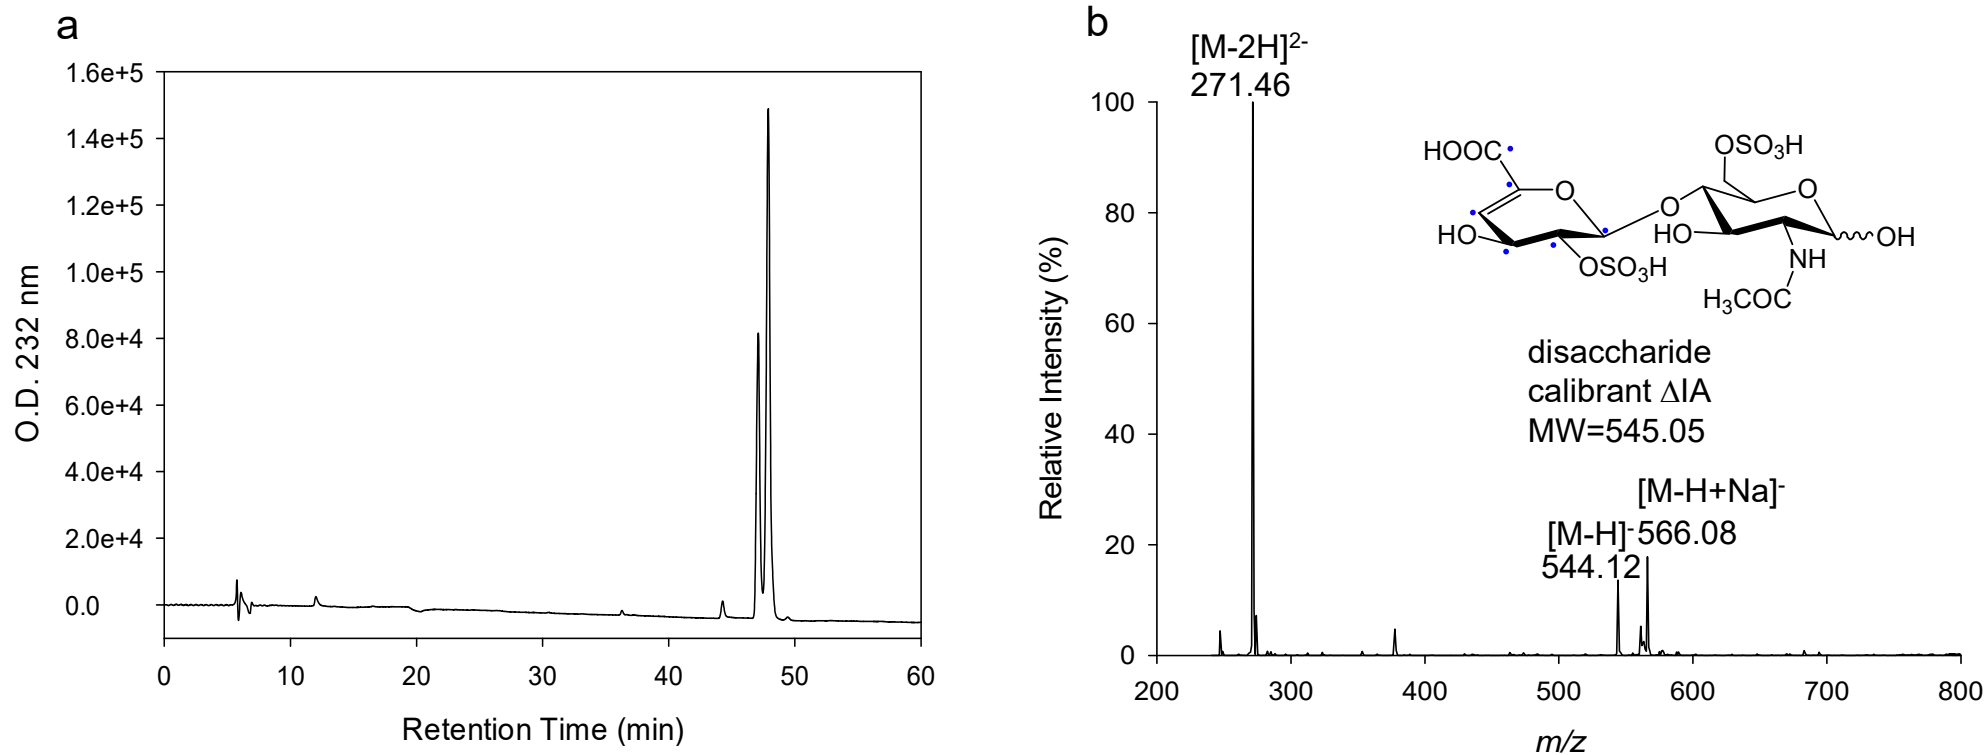

**Supplementary Fig. 5.** Purity analysis of disaccharide calibrant  $\Delta$ IA. Panel **a** shows the SAX-HPLC chromatogram. A major single peak with a shoulder peak was eluted at 47 min, suggesting that the chemical purity of disaccharide calibrant  $\Delta$ IA is high. The shoulder peak is an anomeric isomer. Panel **b** shows the ESI-MS spectrum of disaccharide calibrant  $\Delta$ IA. The measured MW was 545.12, which is very close to the calculated value of 545.05. No signal in the  $m/z$  value of 268.51  $[M-2H]^{2-}$  and 538.03  $[M-H]^-$ , the molecular ions representing unlabeled  $\Delta$ IA counterpart. The data suggest that our preparation of disaccharide calibrant  $\Delta$ IA standard has high isotopic purity.

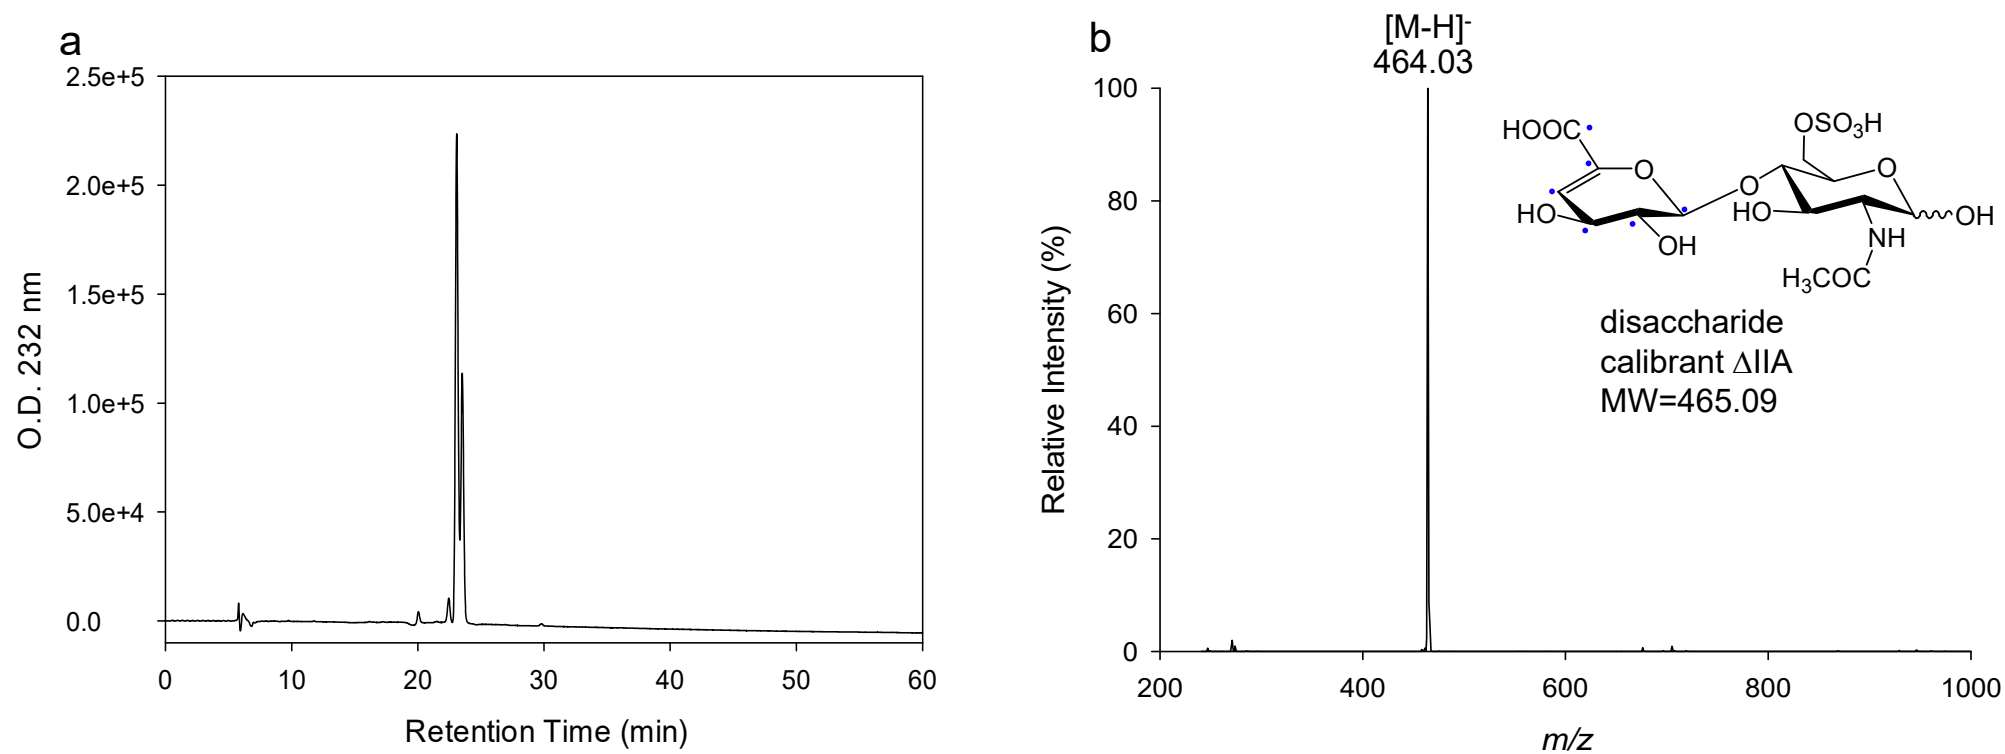

**Supplementary Fig. 6.** Purity analysis of disaccharide calibrant  $\Delta$ IIA. Panel **a** shows the SAX-HPLC chromatogram. A major single peak with a shoulder peak was eluted at 24 min, suggesting that the chemical purity of disaccharide calibrant  $\Delta$ IIA is high. The shoulder peak is an anomeric isomer. Panel **b** shows the ESI-MS spectrum of disaccharide calibrant  $\Delta$ IIA. The measured MW was 465.03, which is very close to the calculated value of 465.09. No signal in the  $m/z$  value of 458.07  $[M-H]^-$ , the molecular ions representing unlabeled  $\Delta$ IIA counterpart. The data suggest that our preparation of disaccharide calibrant  $\Delta$ IIA standard has high isotopic purity.

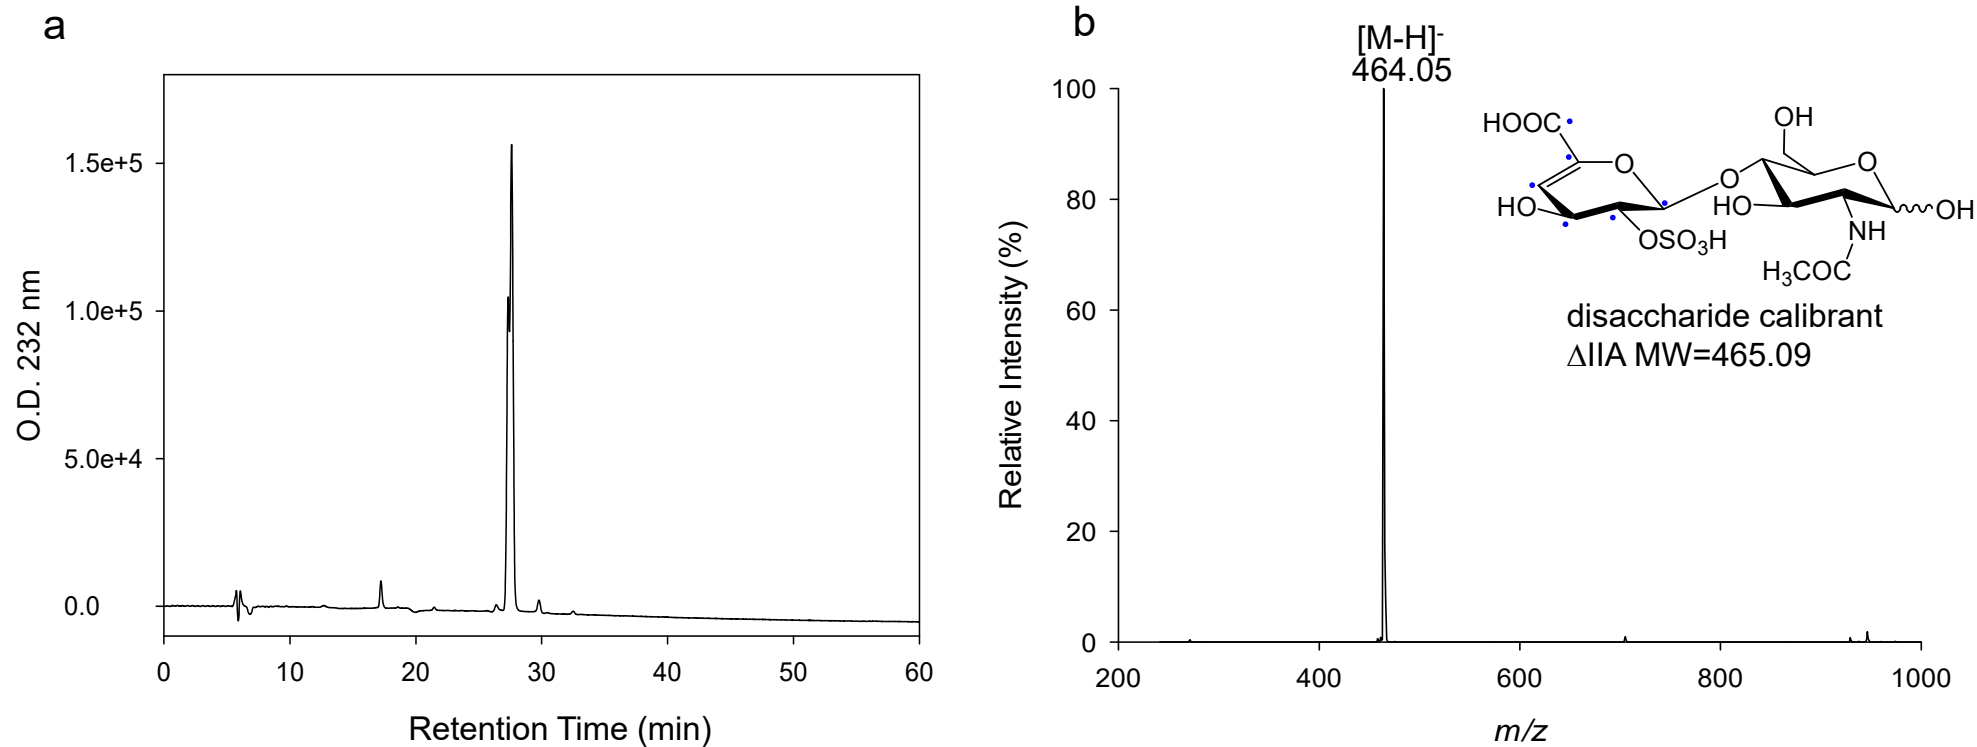

**Supplementary Fig. 7.** Purity analysis of disaccharide calibrant  $\Delta$ IIIA. Panel **a** shows the SAX-HPLC chromatogram. A major single peak with a shoulder peak was eluted at 27 min, suggesting that the chemical purity of disaccharide calibrant  $\Delta$ IIIA is high. The small shoulder peak is an anomeric isomer. Panel **b** shows the ESI-MS spectrum of disaccharide calibrant  $\Delta$ IIIA. The measured MW was 465.05, which is very close to the calculated value of 465.09. No signal in the *m/z* value of 458.07  $[M-H]^-$ , the molecular ions representing unlabeled  $\Delta$ IIIA counterpart. The data suggest that our preparation of disaccharide calibrant  $\Delta$ IIIA standard has high isotopic purity.



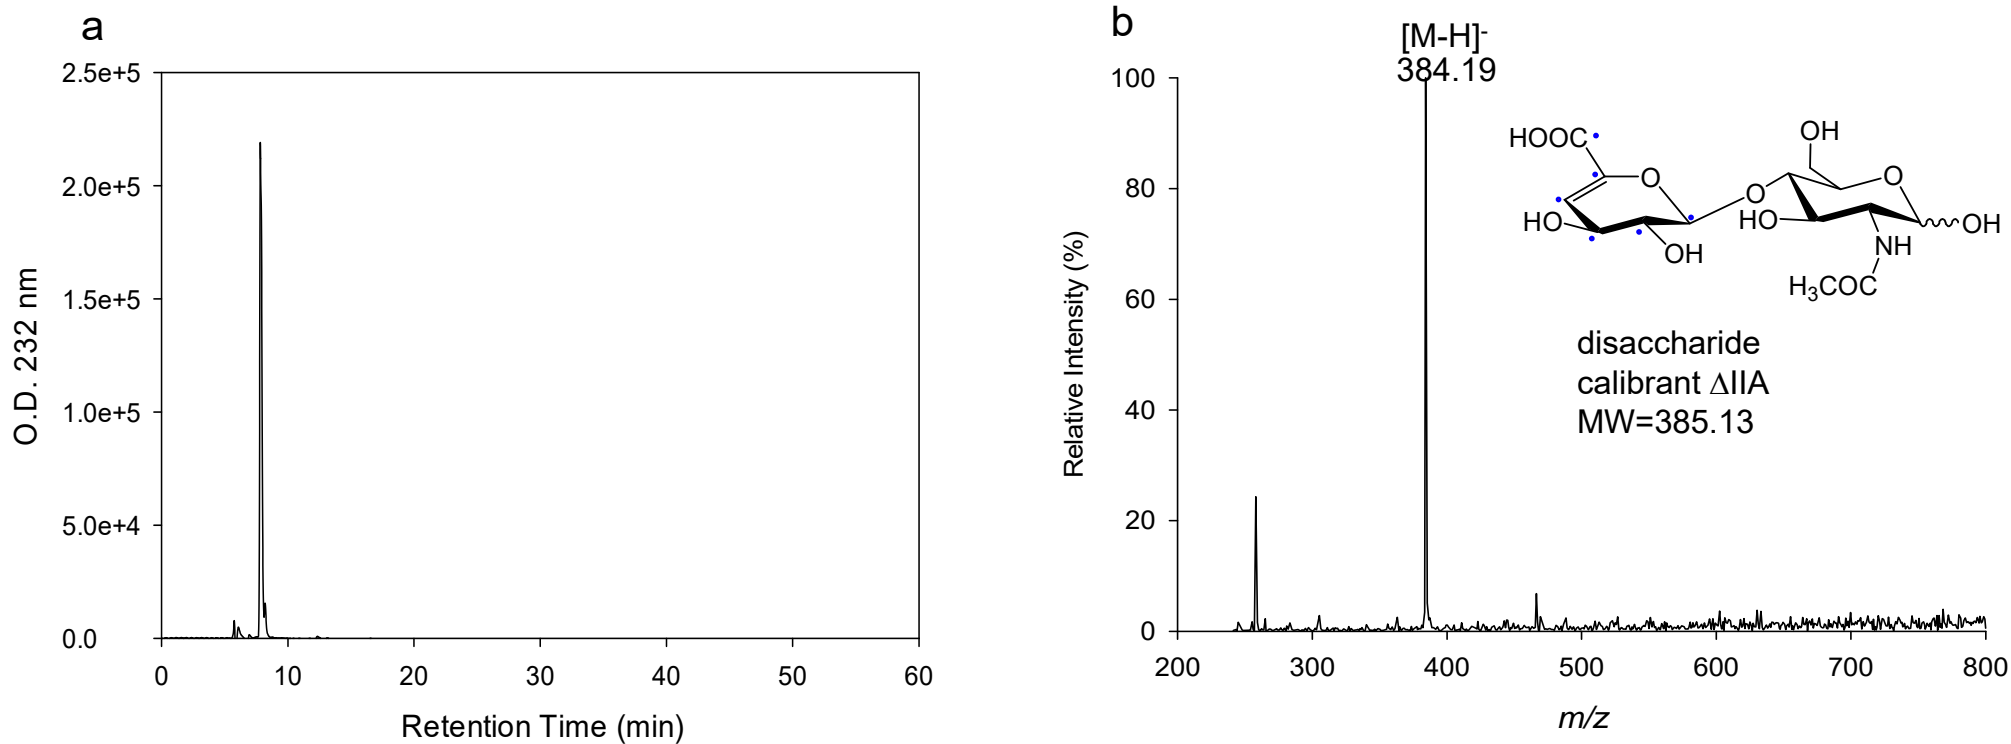

**Supplementary Fig. 8.** Purity analysis of disaccharide calibrant  $\Delta$ IVA. Panel **a** shows the SAX-HPLC chromatogram. A major single peak was eluted at 8 min, suggesting that the chemical purity of disaccharide calibrant  $\Delta$ IVA is high. Panel **b** shows the ESI-MS spectrum of disaccharide calibrant  $\Delta$ IVA. The measured MW was 385.19, which is very close to the calculated value of 385.13. No signal in the  $m/z$  value of 378.11  $[M-H]^-$ , the molecular ions representing unlabeled  $\Delta$ IVA counterpart. The data suggest that our preparation of disaccharide calibrant  $\Delta$ IVA standard has high isotopic purity.

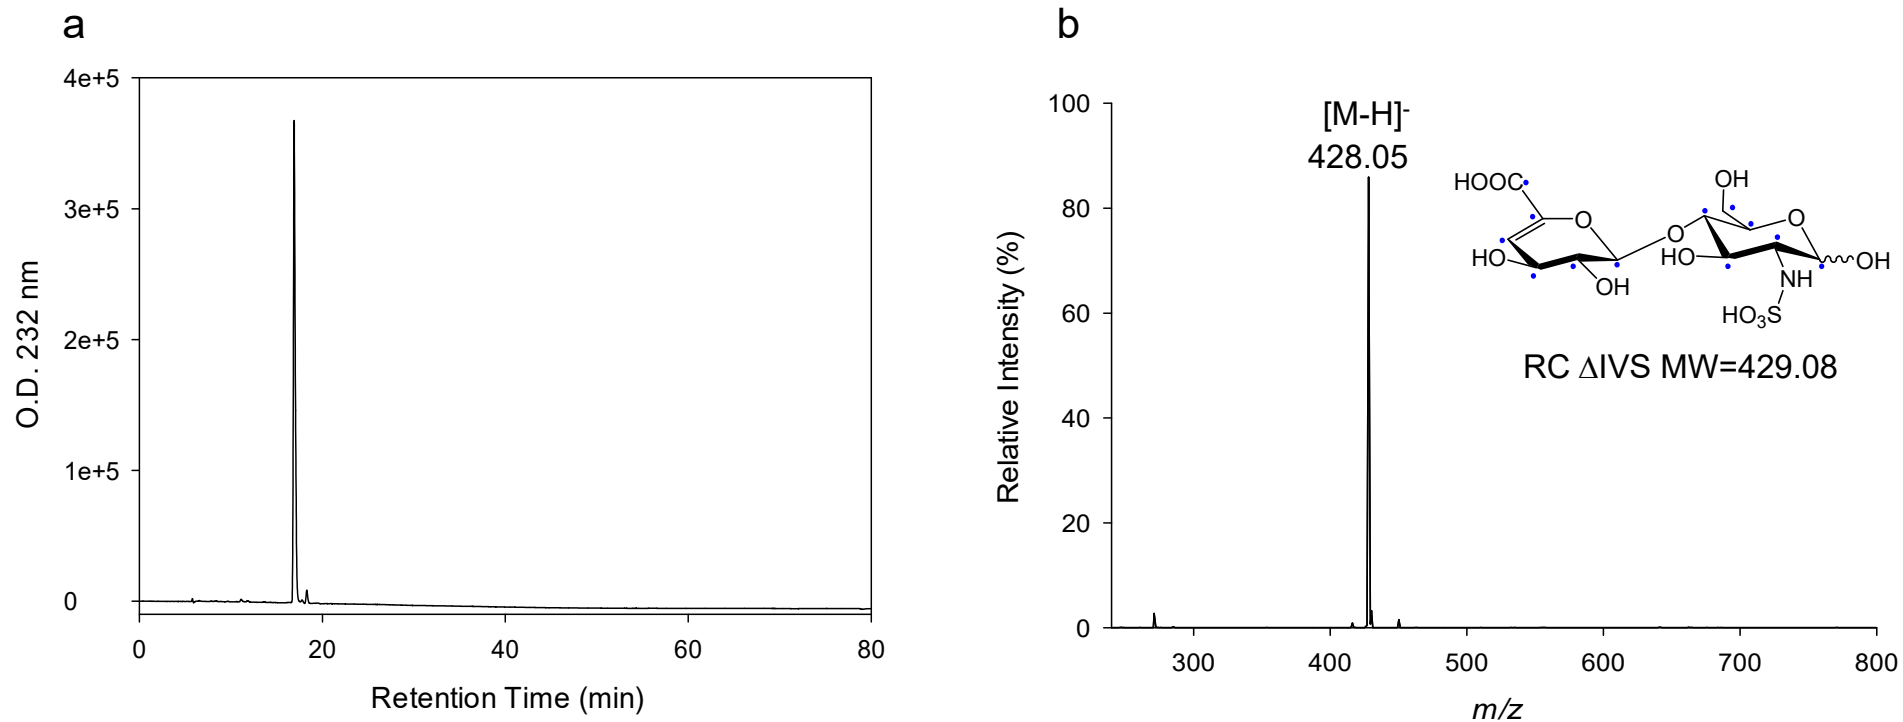

**Supplementary Fig. 9.** Disaccharide compositional analysis of RC standard. Panel **a** shows the SAX-HPLC chromatogram of RC standard after the digestion with heparin lyases. Only a single disaccharide of RC  $\Delta$ IVS was observed, confirming that the RC standard is N-sulfo heparosan with the anticipated disaccharide repeating unit. Panel **b** shows the ESI-MS spectrum of the disaccharide from RC standard. The measured MW of the disaccharide was 429.05, which is close to the calculated value of 429.08. No signals at the range of  $m/z$  of 416.06 to 422.08 were observed, suggesting that the RC standard has high isotopic purity.

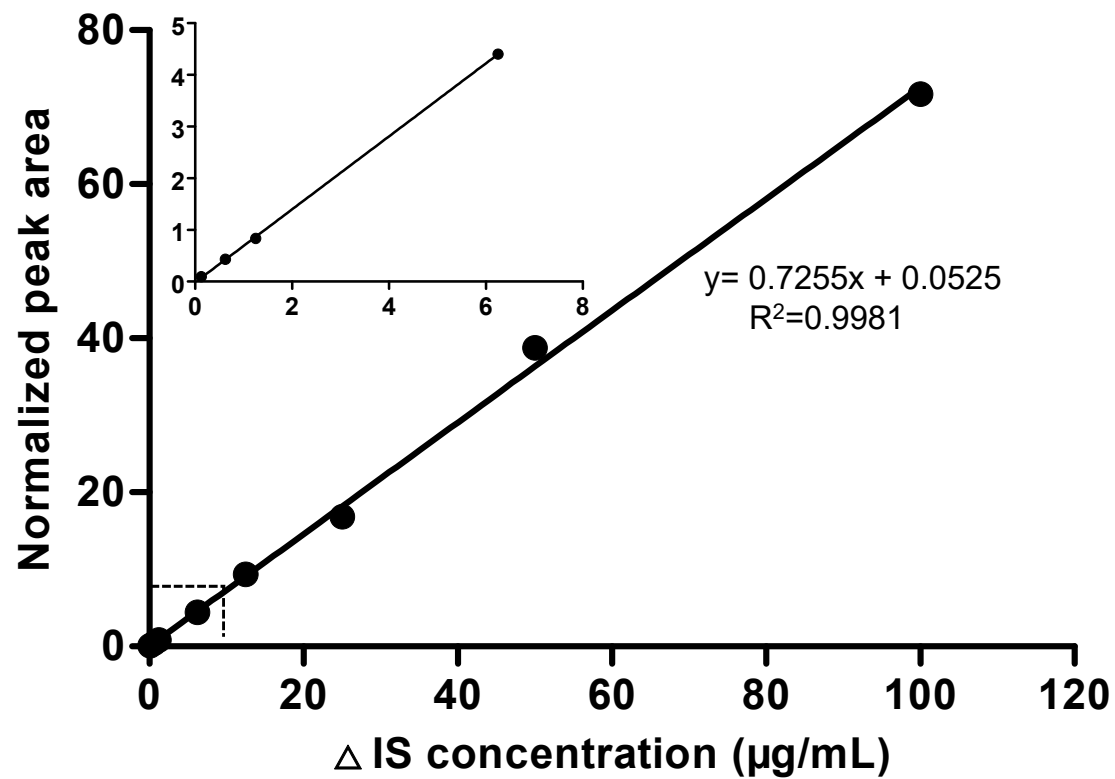

**Supplementary Fig. 10.** Linear dynamic range curve of  $\Delta$ IS. The curve and linear equation of normalized peak area as a function of concentration for  $\Delta$ IS are shown. The concentration of  $\Delta$ IS used for LC-MS/MS analysis were 0.125, 0.625, 1.25, 6.25, 12.5, 25, 50 and 100  $\mu\text{g/mL}$ , mixing with 1.25  $\mu\text{g/mL}$  disaccharide calibrant  $\Delta$ IS. Data represent means  $\pm$  S.D. (n=3)

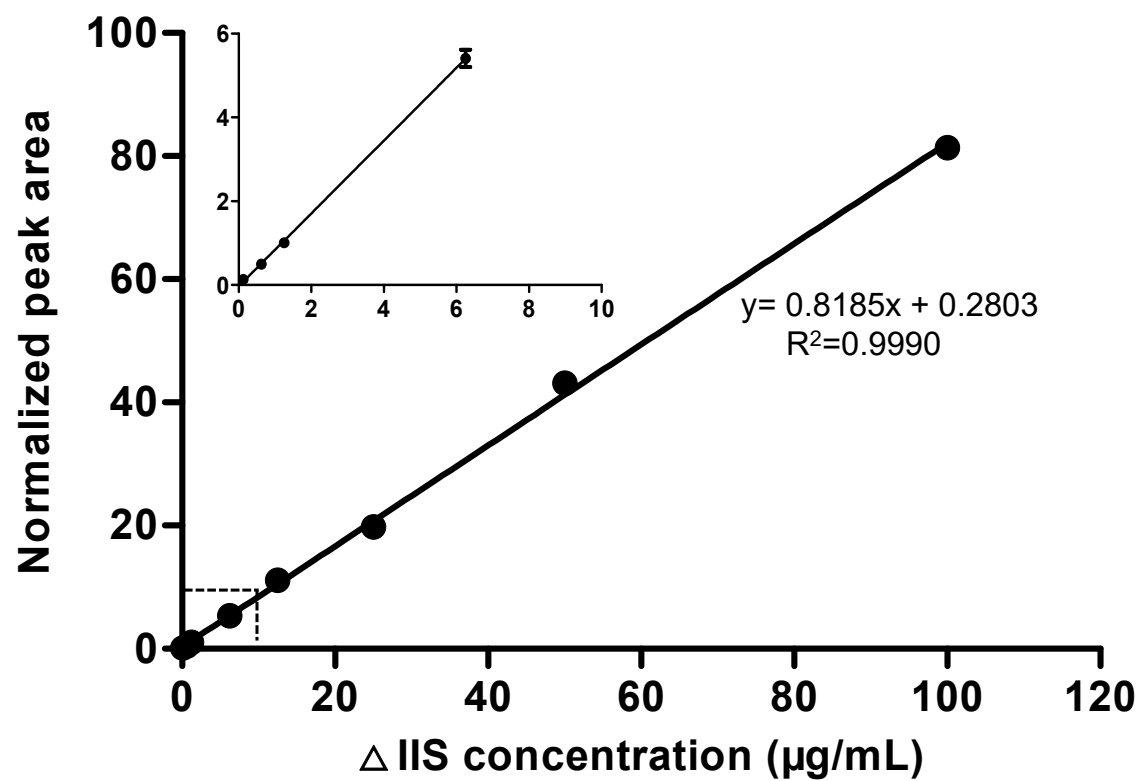

**Supplementary Fig. 11.** Linear dynamic range curve of  $\Delta$ IIS. The curve and linear equation of normalized peak area as a function of concentration for  $\Delta$ IIS are shown. The concentration of  $\Delta$ IIS used for LC-MS/MS analysis were 0.125, 0.625, 1.25, 6.25, 12.5, 25, 50 and 100  $\mu\text{g/mL}$ , mixing with 1.25  $\mu\text{g/mL}$  disaccharide calibrant  $\Delta$ IIS. Data represent means  $\pm$  S.D. ( $n=3$ )

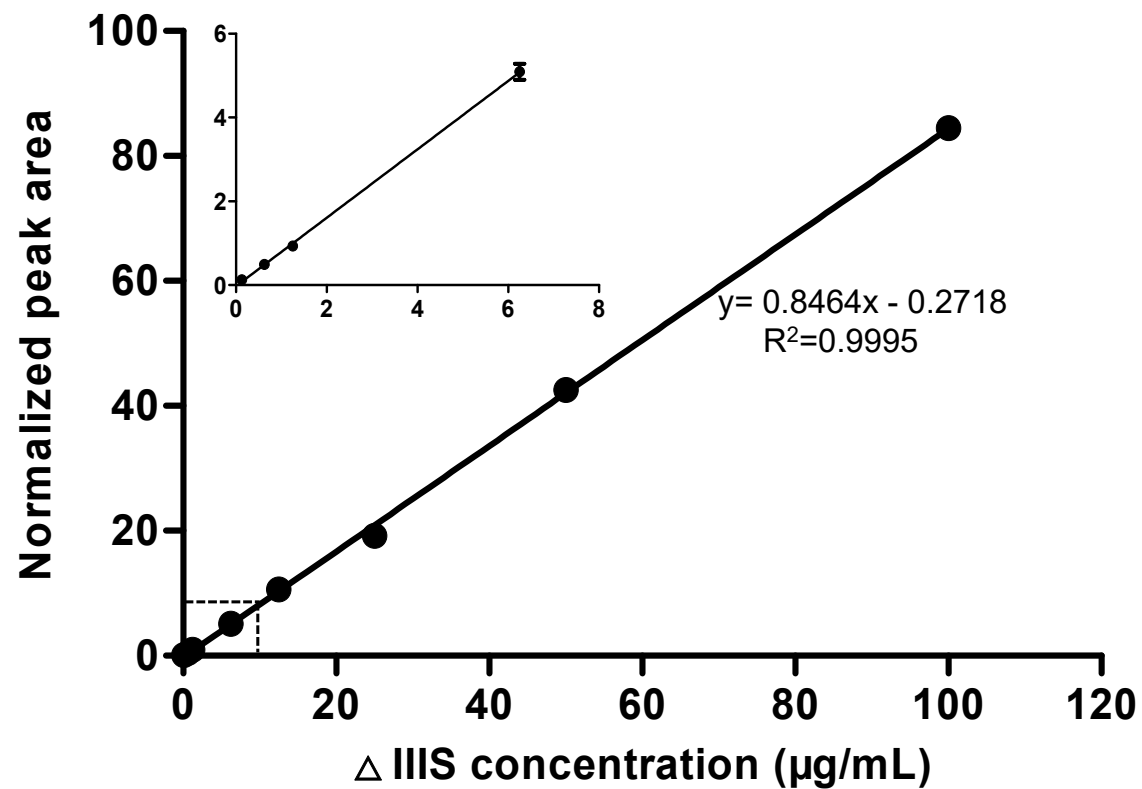

**Supplementary Fig. 12.** Linear dynamic range curve of  $\Delta$ IIS. The curve and linear equation of normalized peak area as a function of concentration for  $\Delta$ IIS are shown. The concentration of  $\Delta$ IIS used for LC-MS/MS analysis were 0.125, 0.625, 1.25, 6.25, 12.5, 25, 50 and 100  $\mu\text{g/mL}$ , mixing with 1.25  $\mu\text{g/mL}$  disaccharide calibrant  $\Delta$ IIS. Data represent means  $\pm$  S.D. (n=3)

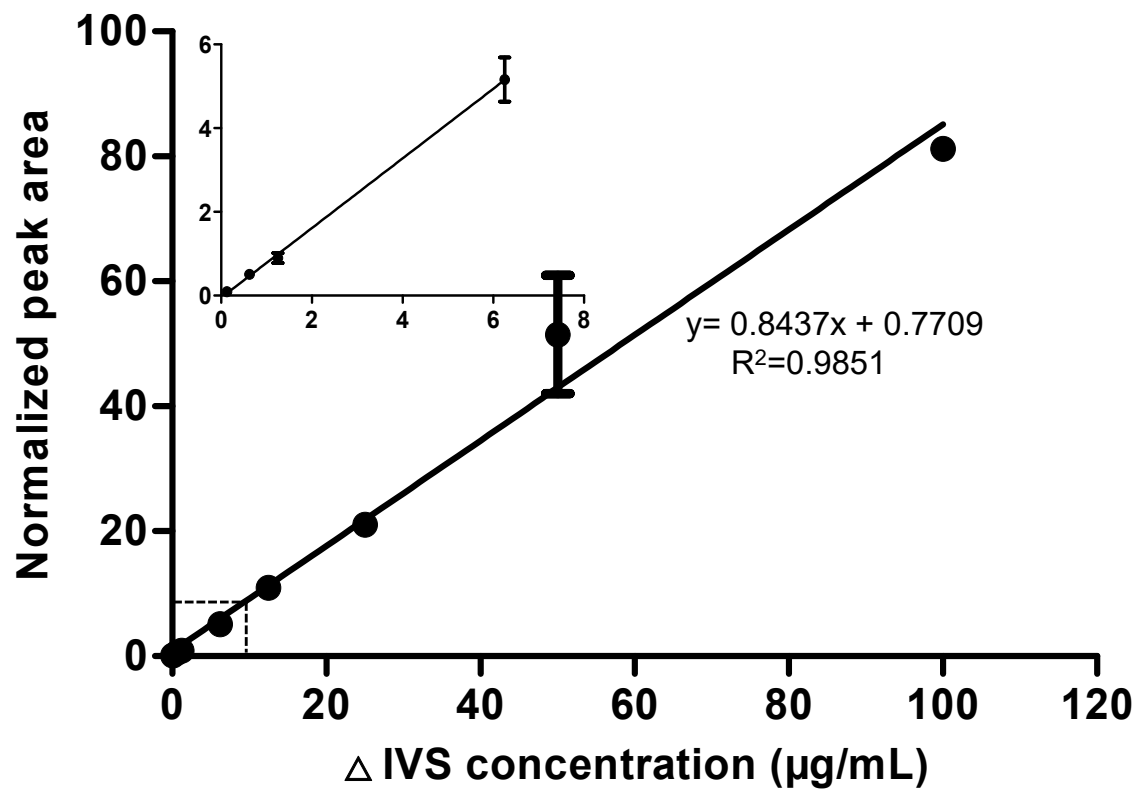

**Supplementary Fig. 13.** Linear dynamic range curve of  $\Delta$ IVS. The curve and linear equation of normalized peak area as a function of concentration for  $\Delta$ IVS are shown. The concentration of  $\Delta$ IVS used for LC-MS/MS analysis were 0.125, 0.625, 1.25, 6.25, 12.5, 25, 50 and 100  $\mu\text{g/mL}$ , mixing with 1.25  $\mu\text{g/mL}$  disaccharide calibrant  $\Delta$ IVS. Data represent means  $\pm$  S.D. (n=3)

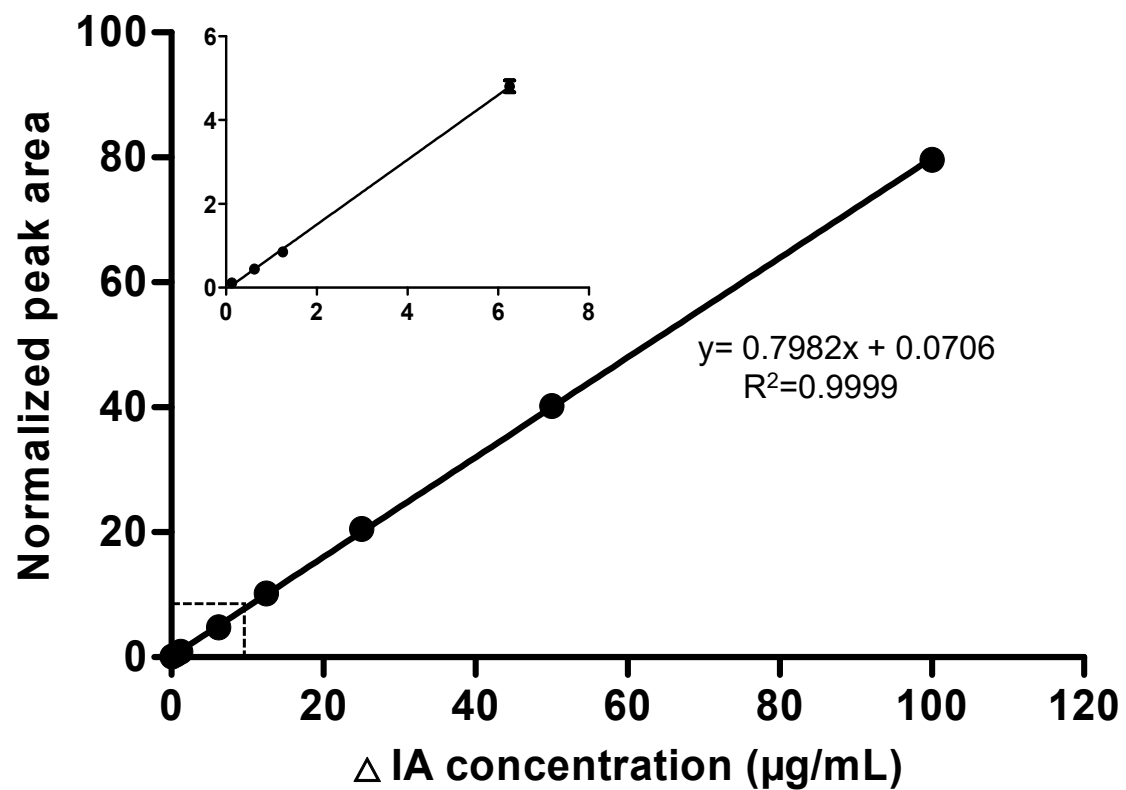

**Supplementary Fig. 14.** Linear dynamic range curve of  $\Delta$ IA. The curve and linear equation of normalized peak area as a function of concentration for  $\Delta$ IA are shown. The concentration of  $\Delta$ IA used for LC-MS/MS analysis were 0.125, 0.625, 1.25, 6.25, 12.5, 25, 50 and 100  $\mu\text{g/mL}$ , mixing with 1.25  $\mu\text{g/mL}$  disaccharide calibrant  $\Delta$ IA. Data represent means  $\pm$  S.D. (n=3)

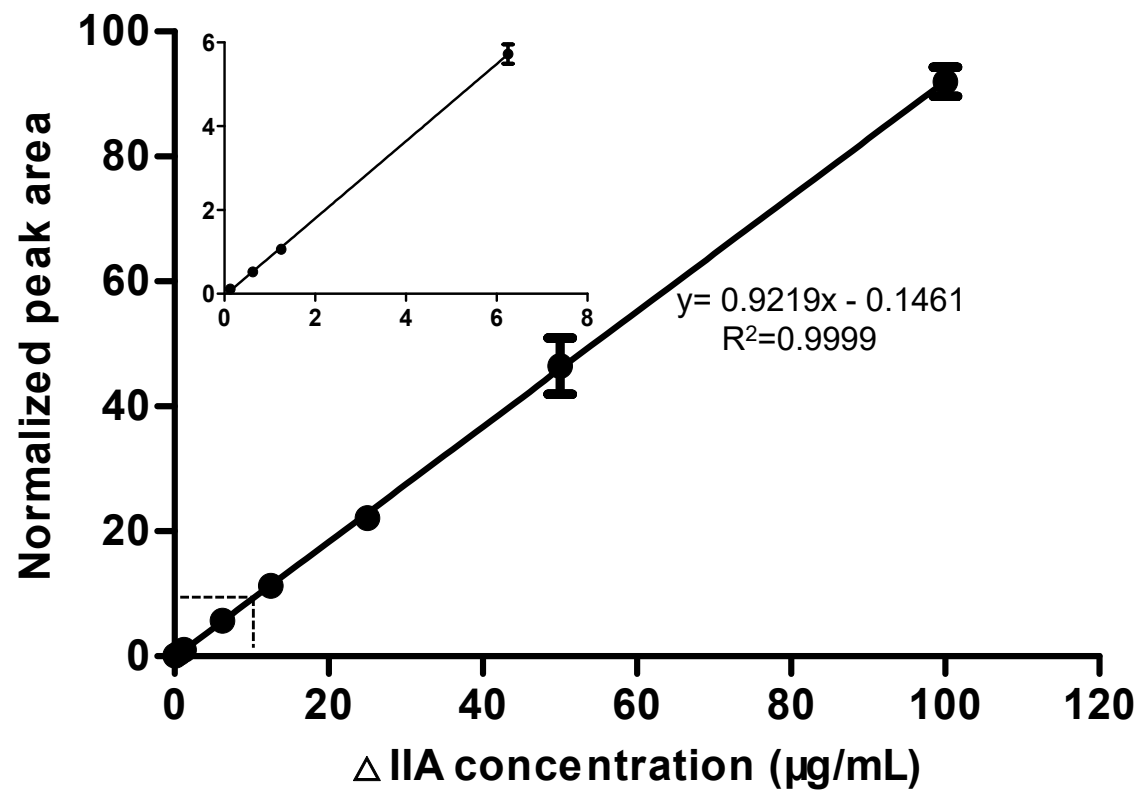

**Supplementary Fig. 15.** Linear dynamic range curve of  $\Delta$ IIA. The curve and linear equation of normalized peak area as a function of concentration for  $\Delta$ IIA are shown. The concentration of  $\Delta$ IIA used for LC-MS/MS analysis were 0.125, 0.625, 1.25, 6.25, 12.5, 25, 50 and 100  $\mu\text{g/mL}$ , mixing with 1.25  $\mu\text{g/mL}$  disaccharide calibrant  $\Delta$ IIA. Data represent means  $\pm$  S.D. (n=3)



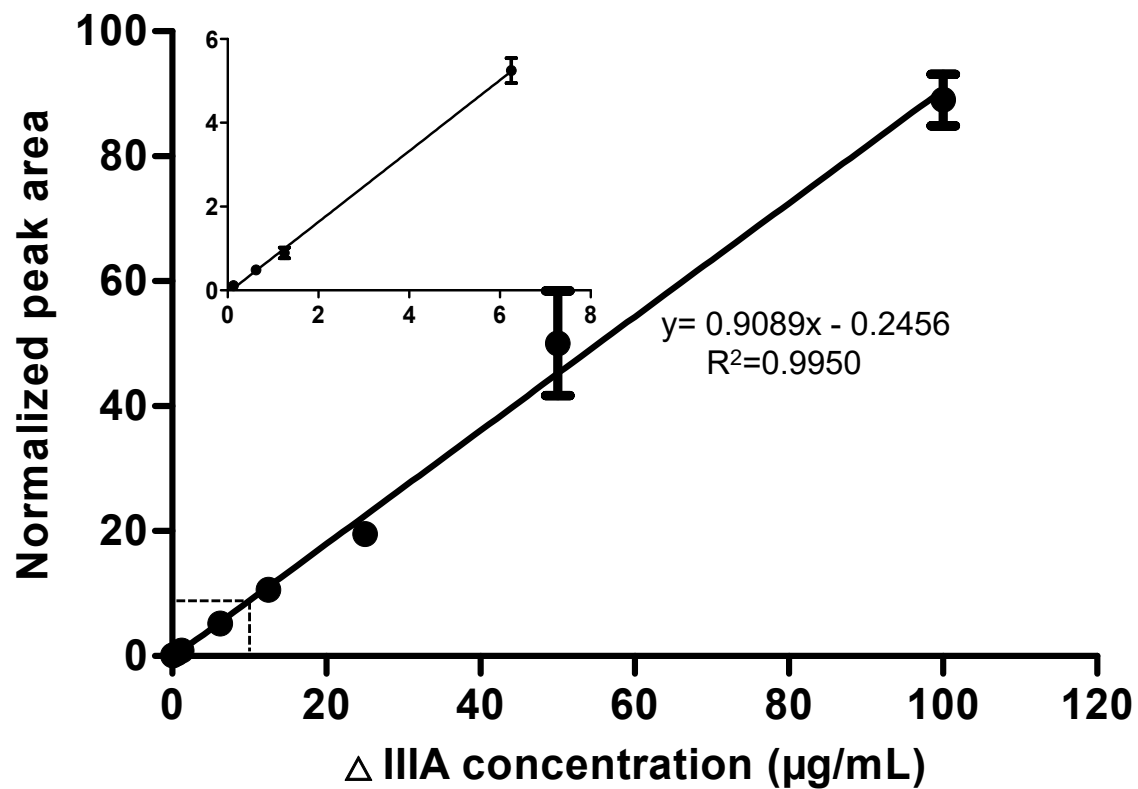

**Supplementary Fig. 16.** Linear dynamic range curve of  $\Delta$ IIIA. The curve and linear equation of normalized peak area as a function of concentration for  $\Delta$ IIIA are shown. The concentration of  $\Delta$ IIIA used for LC-MS/MS analysis were 0.125, 0.625, 1.25, 6.25, 12.5, 25, 50 and 100  $\mu\text{g/mL}$ , mixing with 1.25  $\mu\text{g/mL}$  disaccharide calibrant  $\Delta$ IIIA. Data represent means  $\pm$  S.D. (n=3)

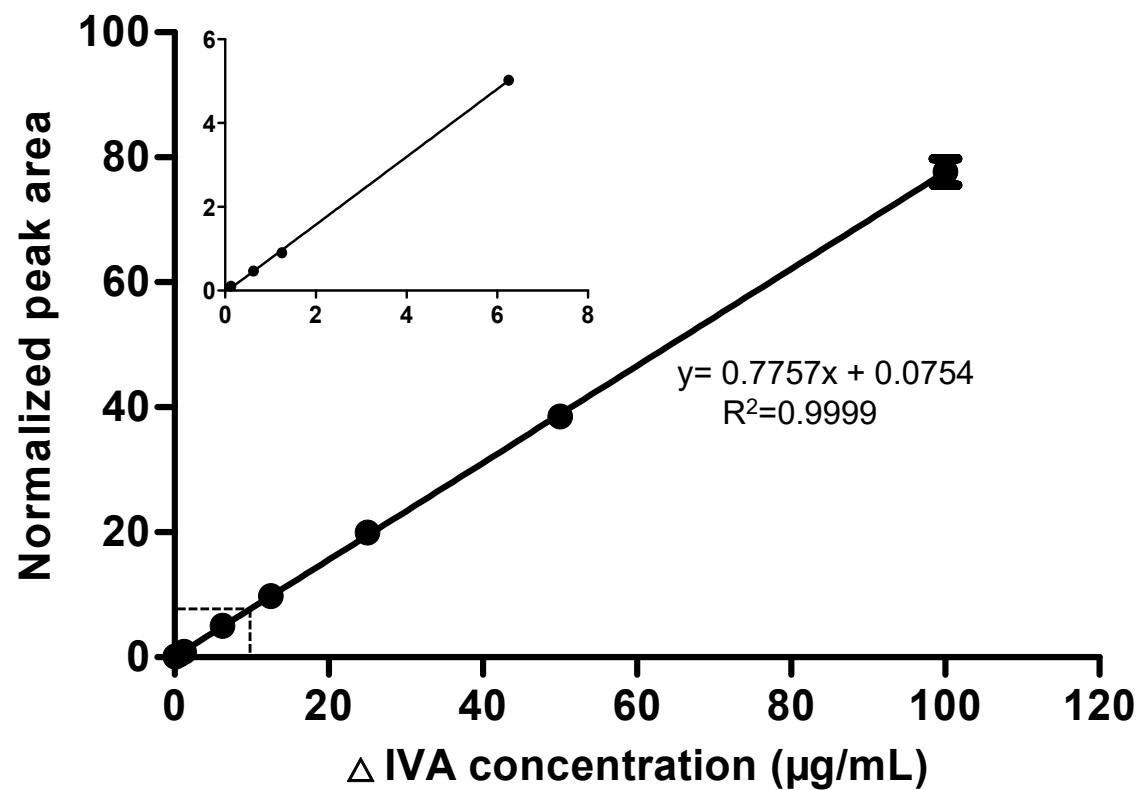

**Supplementary Fig. 17.** Linear dynamic range curve of  $\Delta$ IVA. The curve and linear equation of normalized peak area as a function of concentration for  $\Delta$ IVA are shown. The concentration of  $\Delta$ IVA used for LC-MS/MS analysis were 0.125, 0.625, 1.25, 6.25, 12.5, 25, 50 and 100  $\mu\text{g/mL}$ , mixing with 1.25  $\mu\text{g/mL}$  disaccharide calibrant  $\Delta$ IVA. Data represent means  $\pm$  S.D. (n=3)

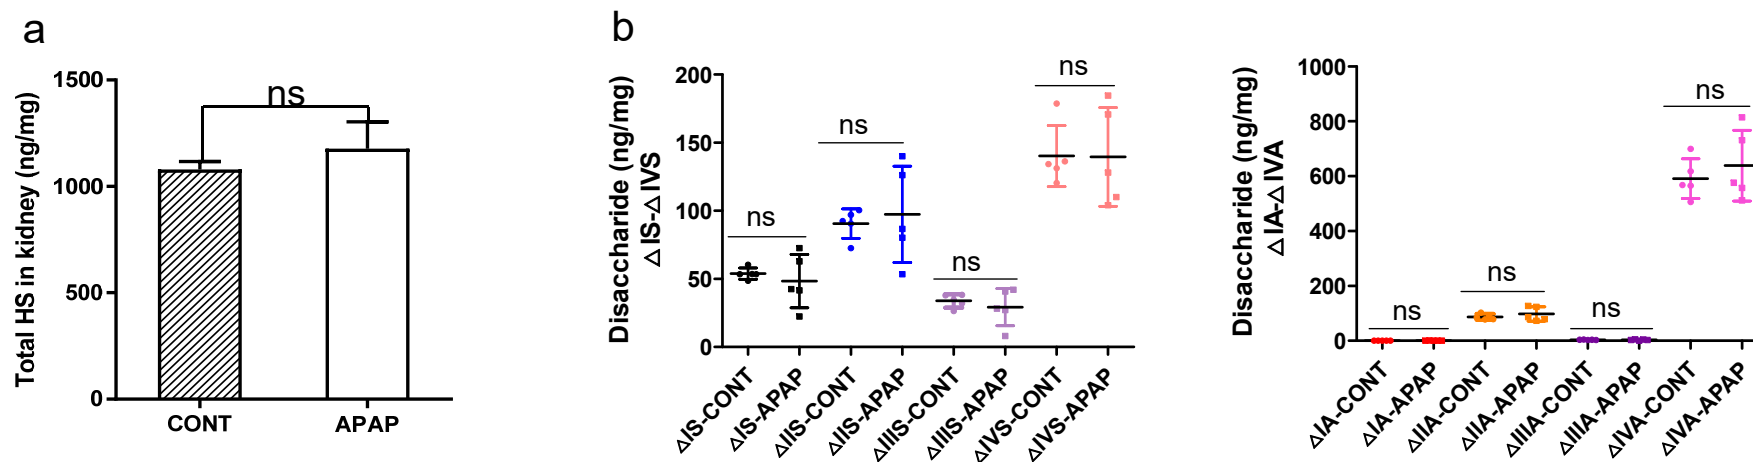

**Supplementary Fig. 18. Demonstrate of the utilities of quantitative LC-MS/MS method in mice kidney heparan sulfate.** Panel **a** shows the total amount heparan sulfate in the kidney of mice with or without APAP overdose. The data is presented as mean  $\pm$  S.D. ( $n = 5$ ). CONT represents the group of animals without APAP overdose; and APAP represents the group of animals with APAP overdose. The  $p$  value was determined by two-tailed unpaired t test, ns, not significant ( $p > 0.05$ ). Panel **b** shows the amount of individual disaccharides from mice kidney with or without APAP overdose.

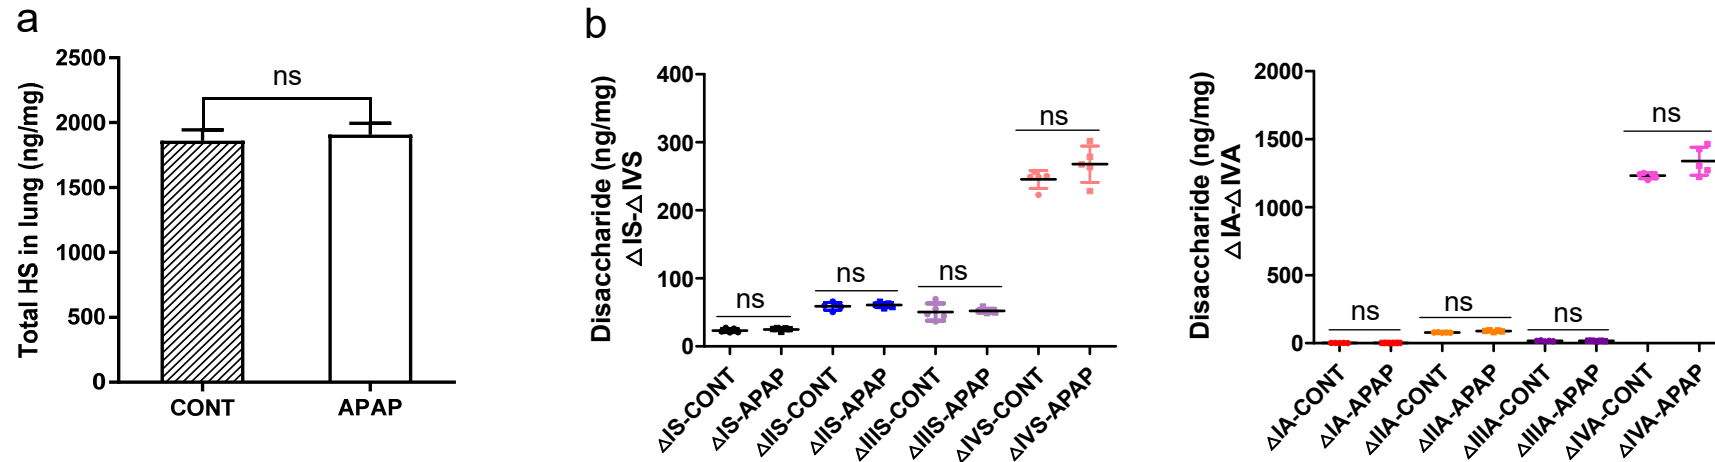

**Supplementary Fig. 19. Demonstrate of the utilities of quantitative LC-MS/MS method in mice lung heparan sulfate.** Panel **a** shows the total amount heparan sulfate in the lung of mice with or without APAP overdose. The data is presented as mean  $\pm$  S.D. (n = 5). CONT represents the group of animals without APAP overdose; and APAP represents the group of animals with APAP overdose. The *p* value was determined by two-tailed unpaired t test, ns, not significant ( $p > 0.05$ ). Panel **b** shows the amount of individual disaccharides from mice lung with or without APAP overdose.

## Supplementary Tables

### Supplementary Table 1

The structure of  $^{13}\text{C}$ -labeled oligosaccharides and prepared  $^{13}\text{C}$ -labeled disaccharide calibrants, and corresponding theoretical molecular mass, amount and purity of  $^{13}\text{C}$ -labeled disaccharide calibrants.

|        | $^{13}\text{C}$ -labeled oligosaccharides                | $^{13}\text{C}$ -labeled disaccharide calibrants | Molecular mass | Amount (mg) | Purity (%) |
|--------|----------------------------------------------------------|--------------------------------------------------|----------------|-------------|------------|
| Comp 1 | GlcNS-GlcA <sup>*</sup> -GlcNS-IdoA2S <sup>*</sup> -     | $\Delta\text{UA}2\text{S}^*$ -GlcNS              | 503.03         | 2.0         | 97.3       |
|        | GlcNS-GlcA-pNP                                           | $\Delta\text{UA}^*$ -GlcNS                       | 423.08         | 2.1         | 97.6       |
| Comp 2 | GlcNS6S-GlcA <sup>*</sup> -GlcNS6S-IdoA2S <sup>*</sup> - | $\Delta\text{UA}2\text{S}^*$ -GlcNS6S            | 582.99         | 3.6         | 95.4       |
|        | GlcNS6S-GlcA-pNP                                         | $\Delta\text{UA}^*$ -GlcNS6S                     | 503.03         | 10.0        | 95.2       |
| Comp 3 | GlcNS-GlcA-GlcNS-IdoA2S <sup>*</sup> -                   | $\Delta\text{UA}2\text{S}^*$ -GlcNAc             | 465.09         | 2.7         | 96.5       |
|        | GlcNAc-GlcA <sup>*</sup> -GlcNAc-GlcA-pNP                | $\Delta\text{UA}^*$ -GlcNAc                      | 385.13         | 1.3         | 99.6       |
| Comp 4 | GlcNS6S-GlcA-GlcNS6S-IdoA2S <sup>*</sup> -               | $\Delta\text{UA}2\text{S}^*$ -GlcNAc6S           | 545.05         | 3.0         | 97.3       |
|        | GlcNAc6S-GlcA <sup>*</sup> -GlcNAc6S-GlcA-pNP            | $\Delta\text{UA}^*$ -GlcNAc6S                    | 465.09         | 2.2         | 95.4       |

<sup>\*</sup>i indicates the saccharide residue carries  $^{13}\text{C}$ -labeled carbon atoms.

**Supplementary Table 2**

The ALT concentration in plasma 24 h after APAP administrations for mice liver tissue harvest

| <b>Subject</b> | <b>ALT concentration (U/L)</b> |                           |
|----------------|--------------------------------|---------------------------|
|                | <b>Saline control mice</b>     | <b>APAP-overdose mice</b> |
| 1              | 37                             | 1901                      |
| 2              | 19                             | 2658                      |
| 3              | 23                             | 3985                      |
| 4              | 28                             | 2684                      |
| 5              | 27                             | 1565                      |
| 6              | 39                             | 2483                      |
| 7              | 23                             | 2967                      |
| 8              | 19                             | 1830                      |

**Supplementary Table 3**

The ALT concentration in plasma 24 h after APAP administrations for mice kidney and lung tissue harvest

| Subject | ALT concentration (U/L) |                    |
|---------|-------------------------|--------------------|
|         | Saline control mice     | APAP-overdose mice |
| 1       | 35.5                    | 4710               |
| 2       | 13.5                    | 3419               |
| 3       | 35                      | 3264               |
| 4       | 23.5                    | 3052               |
| 5       | 18                      | 3366               |

### Supplementary Table 4

Comparison of disaccharide composition of liver HS in the Saline control and APAP-overdose mice.

| Subject   | Saline control mice liver- Disaccharides (ng/mg) |              |               |              |             |              |               |               | HS recovery yield     | Total HS                |
|-----------|--------------------------------------------------|--------------|---------------|--------------|-------------|--------------|---------------|---------------|-----------------------|-------------------------|
|           | $\Delta$ IS                                      | $\Delta$ IIS | $\Delta$ IIIS | $\Delta$ IVS | $\Delta$ IA | $\Delta$ IIA | $\Delta$ IIIA | $\Delta$ IIVA | (%)                   | (ng/mg)                 |
| 1         | 16.7±0.5 <sup>a</sup>                            | 13.7±0.3     | 3.9±0.03      | 23.9±0.9     | 0.2±0.01    | 19.3±0.2     | 0.8±0.2       | 101.5±2.4     | 93.8±3.3 <sup>b</sup> | 191.4±1.7 <sup>c</sup>  |
| 2         | 14.4±0.3                                         | 15.1±0.3     | 2.2±0.1       | 27.3±0.4     | 0.2±0.1     | 24.1±0.5     | 0.7±0.2       | 116.5±1.0     | 94.3±0.4              | 213.3±1.2               |
| 3         | 12.7±0.2                                         | 13.6±0.2     | 3.0±0.2       | 29.0±2.2     | 0.2±0.1     | 22.3±0.5     | 0.9±0.2       | 135.7±3.0     | 93.8±6.1              | 231.2±2.4               |
| 4         | 11.2±0.2                                         | 13.5±0.2     | 2.6±0.1       | 25.3±1.7     | 0.1±0.0     | 19.5±0.8     | 0.3±0.2       | 104.8±4.2     | 97.2±8.2              | 182.8±5.8               |
| 5         | 11.0±0.2                                         | 13.8±0.4     | 3.6±0.2       | 36.1±3.9     | 0.1±0.0     | 18.7±0.3     | 0.6±0.1       | 157.8±2.4     | 102.7±10.4            | 241.8±6.4               |
| 6         | 11.5±0.1                                         | 12.8±0.4     | 3.0±0.1       | 29.9±2.7     | 0.1±0.0     | 20.2±0.8     | 0.6±0.0       | 123.6±2.2     | 92.3±5.8              | 219.2±4.0               |
| 7         | 14.5±0.4                                         | 18.1±0.5     | 3.1±0.1       | 35.7±2.7     | 0.1±0.0     | 26.4±0.6     | 0.6±0.1       | 166.0±1.7     | 101.4±5.6             | 264.5±3.1               |
| 8         | 11.4±0.3                                         | 11.4±0.3     | 3.7±0.2       | 25.0±1.1     | 0.1±0.0     | 17.3±0.5     | 0.6±0.0       | 110.9±3.3     | 106.1±4.3             | 180.4±3.1               |
| Ave (n=8) | 12.9±2.1 <sup>d</sup>                            | 14.0±2.0     | 3.1±0.6       | 29.0±4.7     | 0.1±0.0     | 21.0±3.0     | 0.6±0.2       | 127.1±24.1    | 97.7±5.1 <sup>e</sup> | 215.6±29.8 <sup>f</sup> |
| Subject   | APAP-overdose mice liver- Disaccharides (ng/mg)  |              |               |              |             |              |               |               | HS recovery yield     | Total HS                |
|           | $\Delta$ IS                                      | $\Delta$ IIS | $\Delta$ IIIS | $\Delta$ IVS | $\Delta$ IA | $\Delta$ IIA | $\Delta$ IIIA | $\Delta$ IIVA | (%)                   | (ng/mg)                 |
| 1         | 26.5±0.9                                         | 27.4±0.7     | 8.3±0.1       | 44.0±1.2     | 0.2±0.1     | 37.9±2.2     | 1.2±0.1       | 220.1±5.9     | 94.3±3.7              | 389.0±10.2              |
| 2         | 15.7±0.7                                         | 18.6±0.1     | 3.3±0.2       | 29.9±1.2     | 0.2±0.1     | 27.9±1.6     | 0.7±0.0       | 145.2±4.3     | 93.9±3.0              | 256.9±3.6               |
| 3         | 25.1±0.9                                         | 20.8±0.3     | 6.6±0.0       | 33.8±1.4     | 0.2±0.0     | 28.2±0.6     | 1.1±0.1       | 177.3±4.6     | 91.8±3.4              | 318.5±4.0               |
| 4         | 15.2±0.0                                         | 23.3±0.4     | 3.7±0.1       | 34.5±3.3     | 0.1±0.0     | 30.6±0.5     | 0.5±0.1       | 172.9±3.9     | 98.4±8.0              | 286.4±3.9               |
| 5         | 12.4±0.2                                         | 23.2±1.2     | 2.2±0.1       | 31.4±1.1     | 0.1±0.0     | 27.4±0.5     | 0.4±0.0       | 147.2±4.3     | 92.3±4.8              | 265.7±4.1               |
| 6         | 15.7±0.7                                         | 24.0±0.8     | 3.0±0.2       | 37.3±0.7     | 0.1±0.0     | 32.9±0.6     | 0.5±0.0       | 187.9±4.5     | 86.1±0.7              | 350.5±6.8               |
| 7         | 17.1±0.2                                         | 26.1±1.2     | 3.1±0.3       | 37.4±1.4     | 0.1±0.0     | 32.5±0.5     | 0.4±0.1       | 171.8±7.4     | 118.2±4.4             | 244.5±7.9               |
| 8         | 12.3±0.5                                         | 21.2±0.3     | 2.1±0.1       | 30.2±2.8     | 0.1±0.0     | 27.1±1.1     | 0.3±0.1       | 149.7±5.0     | 102.9±9.3             | 214.8±8.4               |
| Ave (n=8) | 17.5±5.4                                         | 23.1±2.9     | 4.0±2.2       | 34.8±4.7     | 0.2±0.1     | 30.5±3.7     | 0.6±0.3       | 171.5±25.1    | 97.2±9.8              | 294.3±53.6              |

a, b and c indicate that the values were means of three measurements ± standard deviations. d, e and f present that the values were means of the measurements of eight mouse liver (n=8) ± standard deviations.



**Supplementary Table 5**

Comparison of disaccharide composition of kidney HS in the Saline control and APAP-overdose mice.

| Subject   | Saline control mice kidney- Disaccharides (ng/mg) |              |               |              |             |              |               |               | HS recovery yield | Total HS     |
|-----------|---------------------------------------------------|--------------|---------------|--------------|-------------|--------------|---------------|---------------|-------------------|--------------|
|           | $\Delta$ IS                                       | $\Delta$ IIS | $\Delta$ IIIS | $\Delta$ IVS | $\Delta$ IA | $\Delta$ IIA | $\Delta$ IIIA | $\Delta$ IIVA | (%)               | (ng/mg)      |
| 1         | 53.4±5.1                                          | 90.6±6.7     | 32.1±1.6      | 131.2±5.7    | 0.6±0.0     | 85.5±0.5     | 3.6±0.4       | 567.8±7.7     | 87.9±5.0          | 1096.4±29.9  |
| 2         | 60.5±5.7                                          | 100.4±6.5    | 38.3±2.0      | 178.7±7.0    | 0.7±0.2     | 103.2±5.8    | 4.7±0.3       | 699.5±8.4     | 109.7±4.2         | 1079.2±7.9   |
| 3         | 53.6±2.4                                          | 72.5±4.0     | 26.4±0.5      | 136.3±16.0   | 0.4±0.1     | 78.3±4.0     | 2.9±0.2       | 565.1±31.8    | 97.2±9.6          | 964.5±20.2   |
| 4         | 53.5±6.7                                          | 92.4±8.4     | 34.8±1.5      | 120.5±4.8    | 0.6±0.1     | 78.7±2.5     | 3.1±0.2       | 506.4±12.8    | 83.8±0.5          | 1059.6±27.8  |
| 5         | 48.7±1.7                                          | 97.2±3.9     | 37.9±2.7      | 134.3±9.2    | 0.6±0.1     | 91.5±1.6     | 3.5±0.2       | 618.0±10.0    | 85.9±5.4          | 1199.6±15.2  |
| Ave (n=5) | 53.9±4.2                                          | 90.6±10.8    | 33.9±5.0      | 140.2±22.4   | 0.6±0.1     | 87.4±10.3    | 3.6±0.7       | 591.4±72.2    | 92.9±10.7         | 1079.9±84.1  |
| Subject   | APAP-overdose mice kidney- Disaccharides (ng/mg)  |              |               |              |             |              |               |               | HS recovery yield | Total HS     |
|           | $\Delta$ IS                                       | $\Delta$ IIS | $\Delta$ IIIS | $\Delta$ IVS | $\Delta$ IA | $\Delta$ IIA | $\Delta$ IIIA | $\Delta$ IIVA | (%)               | (ng/mg)      |
| 1         | 72.5±3.6                                          | 140.1±5.7    | 42.1±1.9      | 184.6±19.7   | 0.8±0.1     | 123.9±7.4    | 5.7±0.7       | 731.3±21.5    | 92.2±11.0         | 1414.2±6.5   |
| 2         | 22.3±1.0                                          | 53.5±1.7     | 8.1±0.1       | 104.1±0.6    | 0.1±0.0     | 72.7±1.6     | 0.2±0.0       | 557.2±11.7    | 85.3±0.1          | 962.7±17.1   |
| 3         | 41.5±0.7                                          | 86.7±1.9     | 27.0±0.6      | 128.1±13.8   | 0.7±0.1     | 86.2±2.6     | 3.1±0.3       | 576.6±12.3    | 87.1±9.3          | 1091.9±4.3   |
| 4         | 42.6±1.9                                          | 80.3±2.2     | 28.3±0.3      | 110.1±4.2    | 0.5±0.0     | 78.7±1.2     | 3.1±0.4       | 512.2±2.8     | 96.5±1.2          | 882.3±7.3    |
| 5         | 63.0±0.8                                          | 126.3±3.9    | 40.7±0.6      | 170.7±6.6    | 0.8±0.1     | 126.8±3.8    | 4.6±0.5       | 814.6±7.5     | 87.5±2.7          | 1531.2±19.5  |
| Ave (n=5) | 48.4±19.7                                         | 97.4±35.3    | 29.2±13.7     | 139.5±36.2   | 0.6±0.3     | 97.7±25.7    | 3.3±2.1       | 638.4±128.5   | 89.7±4.6          | 1176.4±283.6 |

**Supplementary Table 6**

Comparison of disaccharide composition of lung HS in the Saline control and APAP-overdose mice.

| Subject   | Saline control mice lung- Disaccharides (ng/mg) |                |                 |                  |               |                |                |                    | HS recovery yield | Total HS          |
|-----------|-------------------------------------------------|----------------|-----------------|------------------|---------------|----------------|----------------|--------------------|-------------------|-------------------|
|           | $\Delta$ IS                                     | $\Delta$ IIS   | $\Delta$ IIIS   | $\Delta$ IVS     | $\Delta$ IA   | $\Delta$ IIA   | $\Delta$ IIIA  | $\Delta$ IVA       | (%)               | (ng/mg)           |
| 1         | 27.3 $\pm$ 2.7                                  | 65.9 $\pm$ 2.1 | 69.6 $\pm$ 1.4  | 250.5 $\pm$ 8.8  | 1.9 $\pm$ 0.2 | 80.8 $\pm$ 2.1 | 21.6 $\pm$ 2.7 | 1243.0 $\pm$ 6.7   | 90.7 $\pm$ 2.2    | 1096.4 $\pm$ 29.9 |
| 2         | 25.9 $\pm$ 1.2                                  | 59.7 $\pm$ 1.5 | 55.1 $\pm$ 1.5  | 249.1 $\pm$ 15.2 | 1.8 $\pm$ 0.4 | 78.9 $\pm$ 1.7 | 18.1 $\pm$ 2.1 | 1199.8 $\pm$ 31.2  | 91.2 $\pm$ 6.4    | 1079.2 $\pm$ 7.9  |
| 3         | 20.7 $\pm$ 0.7                                  | 58.1 $\pm$ 0.6 | 47.0 $\pm$ 0.5  | 256.5 $\pm$ 31.7 | 1.8 $\pm$ 0.2 | 78.7 $\pm$ 3.0 | 17.2 $\pm$ 0.5 | 1245.5 $\pm$ 61.8  | 97.3 $\pm$ 13.7   | 964.5 $\pm$ 20.2  |
| 4         | 20.6 $\pm$ 0.8                                  | 50.4 $\pm$ 2.0 | 44.4 $\pm$ 1.3  | 223.0 $\pm$ 9.4  | 1.5 $\pm$ 0.3 | 76.8 $\pm$ 3.6 | 14.6 $\pm$ 0.5 | 1252.5 $\pm$ 13.1  | 85.7 $\pm$ 4.1    | 1059.6 $\pm$ 27.8 |
| 5         | 22.0 $\pm$ 1.6                                  | 60.5 $\pm$ 1.3 | 36.4 $\pm$ 0.7  | 249.0 $\pm$ 19.4 | 1.6 $\pm$ 0.2 | 78.0 $\pm$ 1.3 | 12.2 $\pm$ 0.9 | 1218.6 $\pm$ 33.3  | 94.2 $\pm$ 5.4    | 1199.6 $\pm$ 15.2 |
| Ave (n=5) | 23.3 $\pm$ 3.1                                  | 58.9 $\pm$ 5.6 | 50.5 $\pm$ 12.6 | 245.6 $\pm$ 13.0 | 1.7 $\pm$ 0.1 | 78.6 $\pm$ 1.5 | 16.7 $\pm$ 3.6 | 1231.9 $\pm$ 22.0  | 91.8 $\pm$ 4.3    | 1862.5 $\pm$ 82.6 |
| Subject   | APAP-overdose mice lung- Disaccharides (ng/mg)  |                |                 |                  |               |                |                |                    | HS recovery yield | Total HS          |
|           | $\Delta$ IS                                     | $\Delta$ IIS   | $\Delta$ IIIS   | $\Delta$ IVS     | $\Delta$ IA   | $\Delta$ IIA   | $\Delta$ IIIA  | $\Delta$ IVA       | (%)               | (ng/mg)           |
| 1         | 25.6 $\pm$ 0.2                                  | 65.6 $\pm$ 2.1 | 49.7 $\pm$ 0.9  | 301.7 $\pm$ 33.2 | 2.0 $\pm$ 0.1 | 93.7 $\pm$ 2.7 | 15.4 $\pm$ 0.8 | 1465.9 $\pm$ 50.8  | 101.6 $\pm$ 11.0  | 1414.2 $\pm$ 6.5  |
| 2         | 26.6 $\pm$ 1.4                                  | 61.2 $\pm$ 1.8 | 51.6 $\pm$ 1.6  | 263.3 $\pm$ 18.5 | 2.0 $\pm$ 0.2 | 87.0 $\pm$ 7.1 | 18.6 $\pm$ 1.3 | 1272.8 $\pm$ 10.9  | 102.8 $\pm$ 8.8   | 962.7 $\pm$ 17.1  |
| 3         | 25.0 $\pm$ 0.5                                  | 57.9 $\pm$ 2.3 | 53.1 $\pm$ 0.6  | 278.7 $\pm$ 12.5 | 1.9 $\pm$ 0.2 | 95.6 $\pm$ 8.0 | 19.5 $\pm$ 1.3 | 1427.1 $\pm$ 26.4  | 102.8 $\pm$ 4.4   | 1091.9 $\pm$ 4.3  |
| 4         | 26.7 $\pm$ 0.9                                  | 62.8 $\pm$ 0.7 | 58.3 $\pm$ 1.4  | 267.4 $\pm$ 7.5  | 1.9 $\pm$ 0.2 | 90.6 $\pm$ 7.7 | 18.7 $\pm$ 1.4 | 1305.1 $\pm$ 28.1  | 96.8 $\pm$ 4.4    | 882.3 $\pm$ 7.3   |
| 5         | 21.1 $\pm$ 0.3                                  | 55.9 $\pm$ 2.2 | 48.9 $\pm$ 1.0  | 228.4 $\pm$ 19.6 | 1.6 $\pm$ 0.1 | 80.9 $\pm$ 2.4 | 15.0 $\pm$ 1.8 | 1223.1 $\pm$ 58.9  | 89.3 $\pm$ 8.0    | 1531.2 $\pm$ 19.5 |
| Ave (n=5) | 25.0 $\pm$ 2.3                                  | 60.7 $\pm$ 3.9 | 52.3 $\pm$ 3.7  | 267.9 $\pm$ 26.7 | 1.9 $\pm$ 0.1 | 89.5 $\pm$ 5.9 | 17.4 $\pm$ 2.1 | 1338.8 $\pm$ 103.5 | 98.7 $\pm$ 5.8    | 1906.3 $\pm$ 89.0 |
