# Supplementary material for: Quantitative analysis of heparan sulfate using isotopically labeled calibrants
Source: PubMed Central journal article supplement (PMC7403576; doi:10.1038/s42003-020-01150-6), 2020-08-04
Supplement: 42003_2020_1150_MOESM3_ESM.pdf [file 42003_2020_1150_MOESM3_ESM.pdf]

## **Description of Additional Supplementary Files**

**File Name:** **Supplementary Data 1**

**Description:** All the original data that were used to make figures presented in the manuscript
